# Supplementary material for: Enhancing Sustained Attention
Source: Springer Nature journal article supplement (doi:10.1007/s12599-021-00701-3), 2021-05-26
Supplement: MOESM1 [file 19200626]

# **Enhancing Sustained Attention – A Pilot Study on the Integration of a Brain-Computer Interface with an Enterprise Information System**

**Théophile Demazure, Alexander Karran, Pierre-Majorique Léger,  
Élise Labonté-LeMoine, Sylvain Sénécal, Marc Fredette, Gilbert Babin**

Business & Information Systems Engineering (2021)

**Appendix (available online via <http://link.springer.com>)**

## Appendix A – Architecture

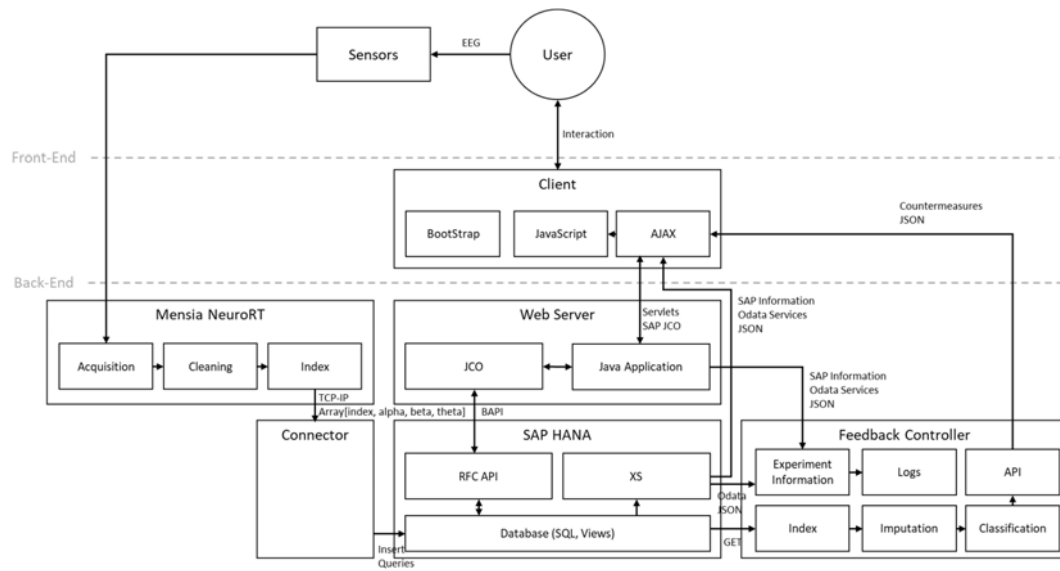

Fig. 12 Integration in SAP HANA architecture

# Appendix B – Questionnaire

## Raw TLX:

---

**Mental Demand**

**How mentally demanding was the task?**

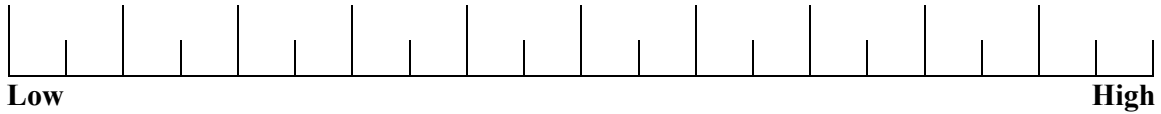

**Physical Demand**

**How physically demanding was the task?**

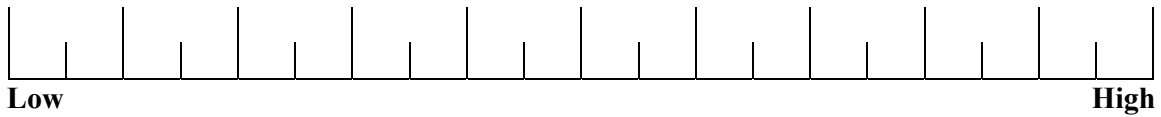

**Temporal Demand**

**How hurried or rushed was the pace of the task?**

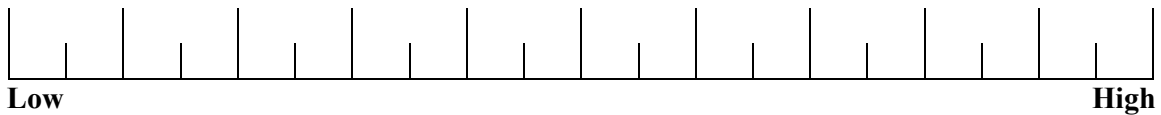

**Performance**

**How successful were you in accomplishing what you were asked to do?**

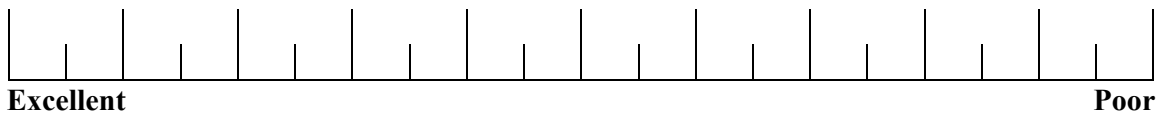

**Effort**

**How hard did you have to work to accomplish your level of performance?**

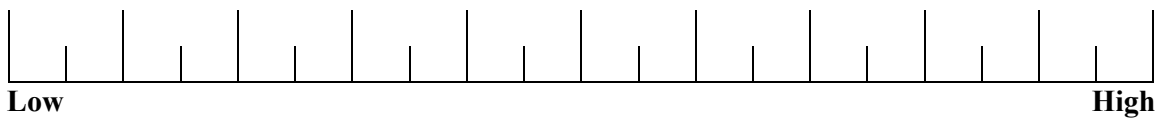

**Frustration**

**How insecure, discouraged, irritated, stressed, and annoyed were you?**

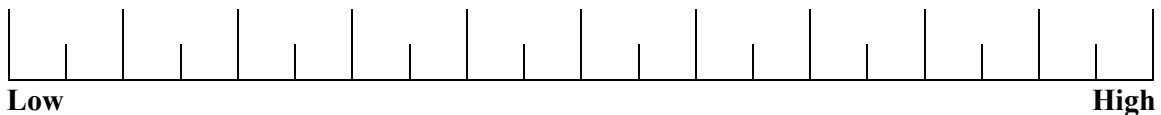

## Boredom Experience Scale:

---

| Not at all | Slightly | Moderately | Very | Extremely |
|------------|----------|------------|------|-----------|
| 1          | 2        | 3          | 4    | 5         |

---

### Durant la simulation, ...

When you were feeling bored, how much did the feeling make you feel restless and unchallenged at the same time? ① ② ③ ④ ⑤

When you were feeling bored, how much did the feeling make you feel that you did not know what to do with your time? ① ② ③ ④ ⑤

When you were feeling bored, how much did the feeling make you unable to stop thinking about things you would rather do? ① ② ③ ④ ⑤

When you were feeling bored, how much did the feeling make you think that the situation served no important purpose? ① ② ③ ④ ⑤

When you were feeling bored, how much did the feeling make you feel like doing something completely different? ① ② ③ ④ ⑤

When you were feeling bored, how much did the feeling make you feel like doing something purposeful? ① ② ③ ④ ⑤

When you were feeling bored, how much did the feeling make you change to more exiting behaviors? ① ② ③ ④ ⑤

When you were feeling bored, how much did the feeling make you turn to a more meaningful activity? ① ② ③ ④ ⑤

When you were feeling bored, how much did the feeling make u want to do something more meaningful? ① ② ③ ④ ⑤

When you were feeling bored, how much did the feeling make you want to be challenged? ① ② ③ ④ ⑤

---
